# Supplementary material for: An easy-to-use water vapor sampling approach for stable isotope analysis using affordable membrane valve multi-foil bags
Source: Copernicus journal article supplement (doi:10.5194/amt-2024-43), 2024-07-01
Supplement: Supplementary file 1 [file amt-2024-43-supplement.pdf]

## Supplement:

Table S1: Material layers of the gas sample bags used (<https://www.samplebags.eu/product/multi-layer-foil-bags-single-stainless-steel-fitting/>).

| Layer | Material                          |
|-------|-----------------------------------|
| 1.    | 60 gauge nylon (outer layer)      |
| 2.    | Metalized aluminum                |
| 3.    | Polyethylene                      |
| 4.    | 0.0003" aluminum foil             |
| 5.    | 0.002" polyethylene (inner layer) |

Table S2: Differences during the storage experiment for M22 and L22 for each depth and storage duration (Overall differences: M22:  $-0.5 \pm 0.5$  ‰ for  $\delta^{18}\text{O}$  and  $0 \pm 1.6$  ‰ for  $\delta^2\text{H}$ ; L22:  $-0.1 \pm 1.1$  ‰ for  $\delta^{18}\text{O}$  and  $2.8 \pm 4.9$  ‰ for  $\delta^2\text{H}$ ).

| Storage duration [d] | M22                       |                        | L22                       |                        |
|----------------------|---------------------------|------------------------|---------------------------|------------------------|
|                      | $\delta^{18}\text{O}$ [‰] | $\delta^2\text{H}$ [‰] | $\delta^{18}\text{O}$ [‰] | $\delta^2\text{H}$ [‰] |
| 1                    | $-0.5 \pm 0.7$            | $-0.7 \pm 1.3$         | $-0.9 \pm 0.4$            | $0.4 \pm 2.6$          |
| 3                    | $-0.7 \pm 0.3$            | $-0.4 \pm 1.6$         | $0.1 \pm 0.5$             | $8.9 \pm 2$            |
| 7                    | $-0.3 \pm 0.2$            | $1 \pm 1.7$            | $1.1 \pm 1.1$             | $-0.9 \pm 1.9$         |

Table S3: Z-scores during the storage experiment for M22 and L22 for each depth and storage duration (Overall differences: M22:  $-1.2 \pm 1.2$  ‰ for  $\delta^{18}\text{O}$  and  $0 \pm 0.6$  ‰ for  $\delta^2\text{H}$ ; L22:  $0.3 \pm 2.7$  for  $\delta^{18}\text{O}$  and  $1.4 \pm 2.5$  for  $\delta^2\text{H}$ ).

| Storage duration [d] | M22                           |                            | L22                           |                            |
|----------------------|-------------------------------|----------------------------|-------------------------------|----------------------------|
|                      | z-score $\delta^{18}\text{O}$ | z-score $\delta^2\text{H}$ | z-score $\delta^{18}\text{O}$ | z-score $\delta^2\text{H}$ |
| 1                    | $-1.2 \pm 1.8$                | $-0.3 \pm 0.6$             | $-2.2 \pm 0.9$                | $0.2 \pm 1.3$              |
| 3                    | $-1.8 \pm 0.7$                | $-0.2 \pm 0.8$             | $0.4 \pm 1.3$                 | $4.4 \pm 1$                |
| 7                    | $-0.7 \pm 0.5$                | $-0.5 \pm 0.8$             | $2.6 \pm 2.8$                 | $-0.5 \pm 0.9$             |
